# Supplementary material for: Influence of Folate-Targeted Gold Nanoparticles on Subcellular Localization and Distribution into Lysosomes
Source: MDPI journal article supplement (doi:10.3390/pharmaceutics15030864), 2023-03-07
Supplement: s1 [file s1]

## Supplementary Information

### Influence of folate-targeted gold nanoparticles on subcellular localization and distribution into lysosomes

Raffaella Daniele<sup>1</sup>, Chiara Brazzale<sup>1</sup>, Busra Arpac<sup>1</sup>, Francesco Tognetti<sup>1</sup>, Cristiano Pesce<sup>1</sup>, Alessio Malfanti<sup>2</sup>, Edward Sayers<sup>3</sup>, Francesca Mastrotto<sup>1</sup>, Arwyn T. Jones<sup>3</sup>, Stefano Salmaso<sup>1,\*</sup>, Paolo Caliceti<sup>1</sup>

<sup>1</sup> Department of Pharmaceutical and Pharmacological Sciences, University of Padova, via F. Marzolo 5, 35131 Padova, Italy

<sup>2</sup> UCLouvain, Louvain Drug Research Institute, Advanced Drug Delivery and Biomaterials, Avenue Mounier 73 B1.73.12, 1200, Brussels, Belgium.

<sup>3</sup> Cardiff School of Pharmacy and Pharmaceutical Sciences, Cardiff University, Redwood Building, King Edward VII Ave, Cardiff CF10 3NB, United Kingdom.

\* Correspondence: stefano.salmaso@unipd.it; Tel.: +390498271602

## TABLES

**Table S1.** Composition of Rhodamine labelled Folate targeted AuNP formulations, size and PDI.

| Sample Code                  | FA-PEG <sub>3.5kDa</sub> -SH<br>/AuNPs | Rho-PEG <sub>2kDa</sub> -SH<br>/AuNPs | Size (nm) | PDI  |
|------------------------------|----------------------------------------|---------------------------------------|-----------|------|
| Rho-FA <sub>0</sub> -AuNPs   | 0                                      | 500                                   | 28.6±5.4  | 0.28 |
| Rho-FA <sub>10</sub> -AuNPs  | 10                                     | 500                                   | 28.8±6.2  | 0.31 |
| Rho-FA <sub>25</sub> -AuNPs  | 25                                     | 500                                   | 29.7±5.8  | 0.33 |
| Rho-FA <sub>50</sub> -AuNPs  | 50                                     | 500                                   | 29.3±6.5  | 0.31 |
| Rho-FA <sub>100</sub> -AuNPs | 100                                    | 500                                   | 29.1±6.1  | 0.28 |

**Table S2.** Statistical 2way ANOVA analysis of colocalization in KB<sup>FR-high</sup> cells of Rho-FA<sub>10</sub>-AuNPs, Rho-FA<sub>50</sub>-AuNPs and the monovalent conjugate FA-C<sub>5</sub>-Rho with lysosomes reported in Figure 7.

| time | Bonferroni's multiple comparisons test                      | Significant | Summary | Adjusted P Value |
|------|-------------------------------------------------------------|-------------|---------|------------------|
| 0 h  |                                                             |             |         |                  |
|      | Rho-FA <sub>10</sub> -AuNPs vs. Rho-FA <sub>50</sub> -AuNPs | No          | ns      | >0.9999          |
|      | Rho-FA <sub>10</sub> -AuNPs vs. Rho-C <sub>5</sub> -FA      | No          | ns      | >0.9999          |
|      | Rho-FA <sub>50</sub> -AuNPs vs. Rho-C <sub>5</sub> -FA      | No          | ns      | >0.9999          |
| 1h   |                                                             |             |         |                  |
|      | Rho-FA <sub>10</sub> -AuNPs vs. Rho-FA <sub>50</sub> -AuNPs | Yes         | *       | 0.0493           |
|      | Rho-FA <sub>10</sub> -AuNPs vs. Rho-C <sub>5</sub> -FA      | NO          | ns      | >0.9999          |
|      | Rho-FA <sub>50</sub> -AuNPs vs. Rho-C <sub>5</sub> -FA      | Yes         | **      | 0.0075           |
| 2 h  |                                                             |             |         |                  |
|      | Rho-FA <sub>10</sub> -AuNPs vs. Rho-FA <sub>50</sub> -AuNPs | Yes         | *       | 0.0393           |
|      | Rho-FA <sub>10</sub> -AuNPs vs. Rho-C <sub>5</sub> -FA      | No          | ns      | >0.9999          |
|      | Rho-FA <sub>50</sub> -AuNPs vs. Rho-C <sub>5</sub> -FA      | Yes         | *       | 0.0248           |
| 4 h  |                                                             |             |         |                  |
|      | Rho-FA <sub>10</sub> -AuNPs vs. Rho-FA <sub>50</sub> -AuNPs | Yes         | *       | 0.0122           |
|      | Rho-FA <sub>10</sub> -AuNPs vs. Rho-C <sub>5</sub> -FA      | No          | ns      | >0.9999          |
|      | Rho-FA <sub>50</sub> -AuNPs vs. Rho-C <sub>5</sub> -FA      | Yes         | **      | 0.0046           |

RESULTS

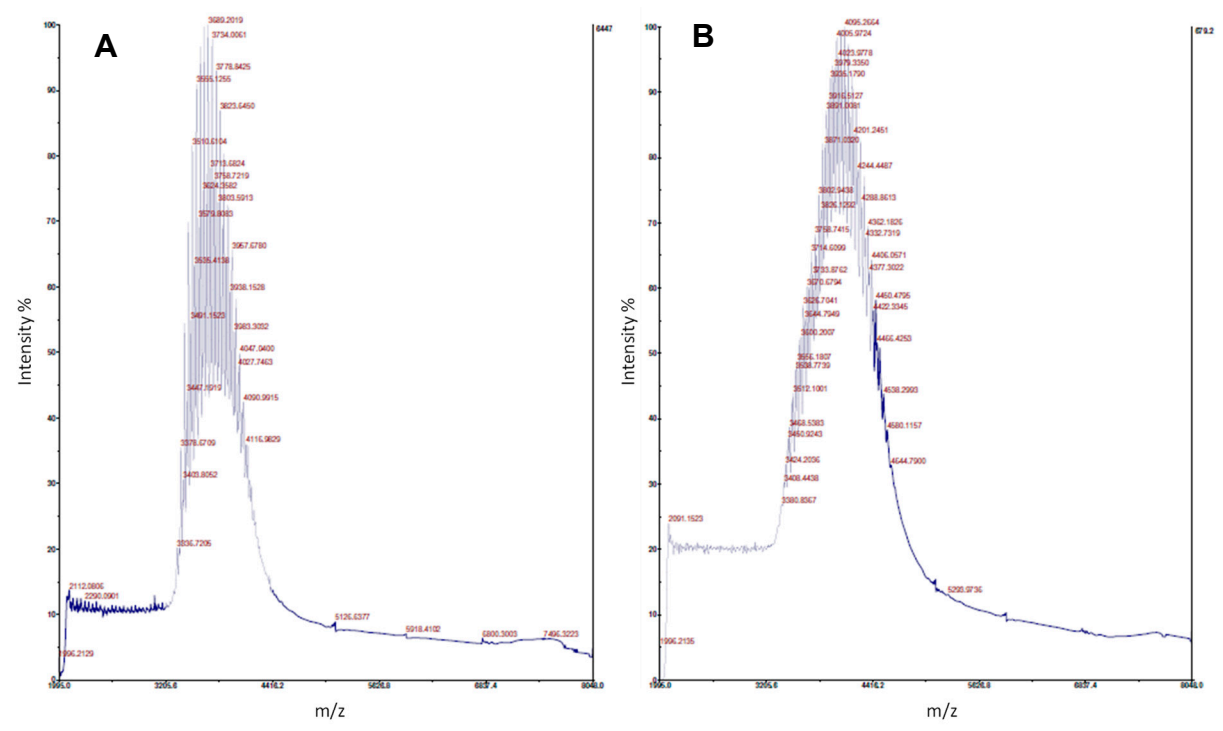

Figure S1. MALDI-TOF spectra of  $\text{NH}_2\text{-PEG}_{3.5\text{kDa}}\text{-SH}$  (A) and  $\text{FA-PEG}_{3.5\text{kDa}}\text{-SH}$  conjugate (B).

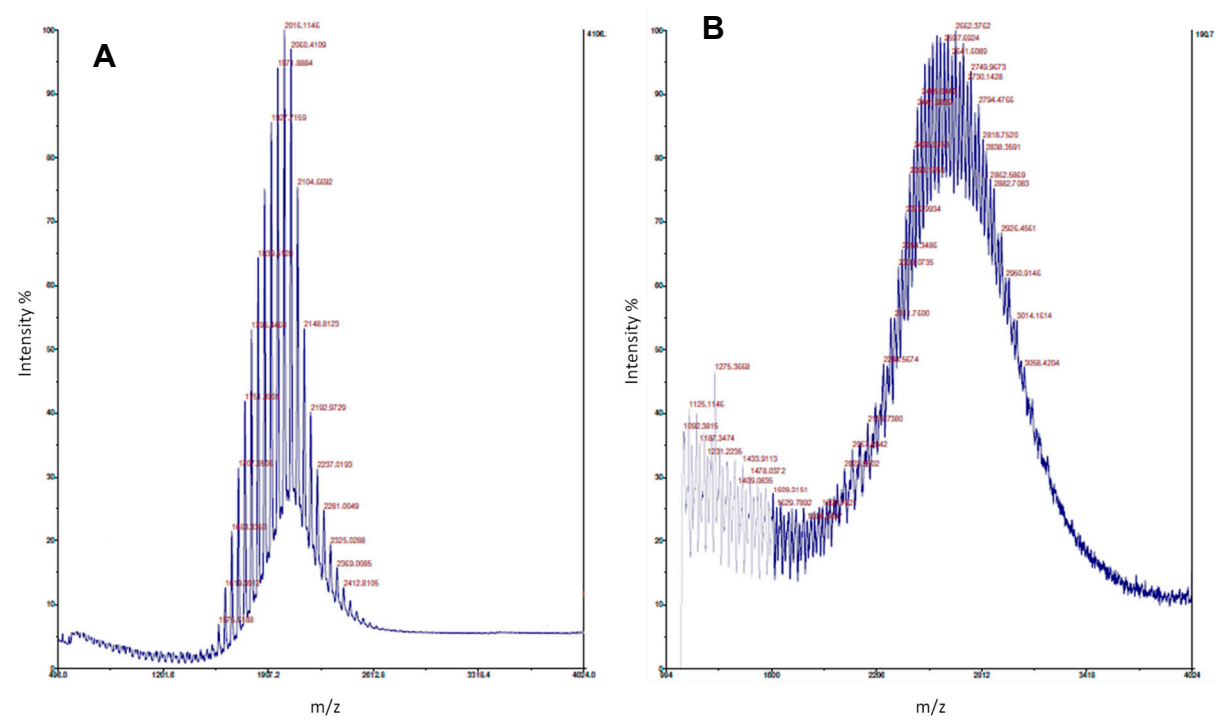

Figure S2. MALDI TOF spectra of starting  $\text{NH}_2\text{-PEG}_{2\text{kDa}}\text{-SH}$  (A) and of  $\text{Rho-PEG}_{2\text{kDa}}\text{-SH}$  conjugate (B).

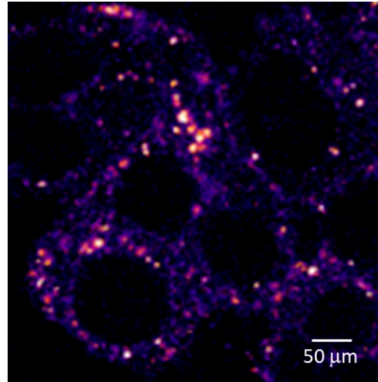

**Figure S3.** Magnification of the white squared area in Figure 5, panel d of confocal microscopic image of KB<sup>FR-high</sup> cells incubated with Rho-FA<sub>50</sub>-AuNPs at pH 7.4. Scale bars: 20 μm.

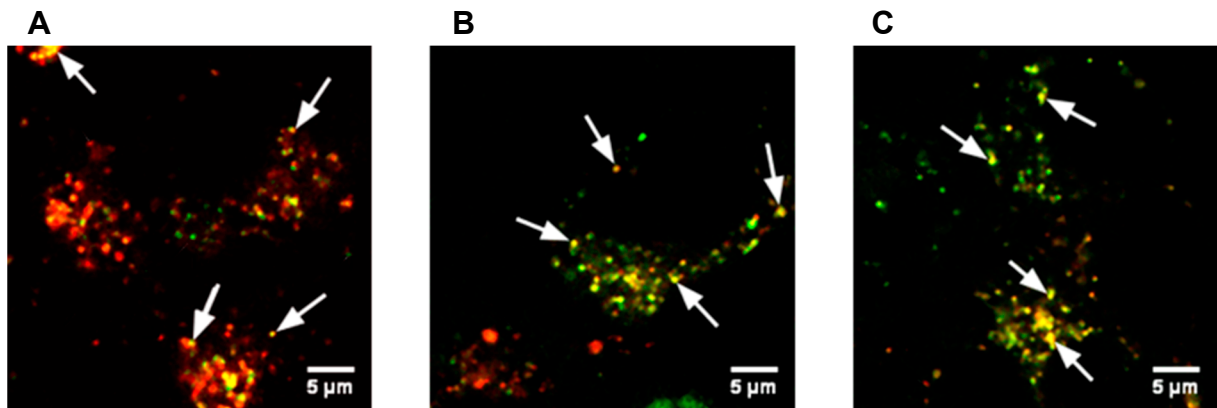

**Figure S4.** Magnification of confocal microscopic image of KB<sup>FR-high</sup> cells treated with Dex-647 to label lysosomes, and then pulsed-chased with Rho-FA<sub>10</sub>-AuNPs (A) Rho-FA<sub>50</sub>-AuNPs (B) and FA-C<sub>5</sub>-Rho (C) for 30 minutes and imaged 4 h post-incubation. Scale bars: 5 μm.
